# Supplementary material
Source: Elsevier journal article supplement (https://www.sciencedirect.com/science/article/pii/S0213911122001261)
Supplement: mmc1 [file S0213911122001261:mmc1.pdf]

## **Anexo A. Material adicional**

**Tabla I**

Proceso metodológico para la utilización de la herramienta *Entornos de Vida*

| Etapa                      | Descripción y actividades                                                                                                                                                                                                                                                                                                                                                                                                                                                                                                                                                                                                                                                                                                                                                                        | Ejemplos                                                                                                                                                                                                                                                                                                                                                                                                                                                                                                                                                                                                                                                                                                                                                                                           | Observaciones según el ámbito de uso: urbano/rural                                                                                                                                                                                                                                                                                                                                                                                                                                                                                                                                                                                                        |
|----------------------------|--------------------------------------------------------------------------------------------------------------------------------------------------------------------------------------------------------------------------------------------------------------------------------------------------------------------------------------------------------------------------------------------------------------------------------------------------------------------------------------------------------------------------------------------------------------------------------------------------------------------------------------------------------------------------------------------------------------------------------------------------------------------------------------------------|----------------------------------------------------------------------------------------------------------------------------------------------------------------------------------------------------------------------------------------------------------------------------------------------------------------------------------------------------------------------------------------------------------------------------------------------------------------------------------------------------------------------------------------------------------------------------------------------------------------------------------------------------------------------------------------------------------------------------------------------------------------------------------------------------|-----------------------------------------------------------------------------------------------------------------------------------------------------------------------------------------------------------------------------------------------------------------------------------------------------------------------------------------------------------------------------------------------------------------------------------------------------------------------------------------------------------------------------------------------------------------------------------------------------------------------------------------------------------|
| 0: Cómo iniciar el proceso | <p>Se promueve el proceso desde una mesa o espacio intersectorial o consejo de salud.</p> <p>Se identifican los miembros del grupo motor que coordine la aplicación de EdV.</p> <p>A las personas que vayan a dinamizar la evaluación, en función de sus características y especialmente a grupos de ciudadanía, se les debe proporcionar formación básica en la utilización de la herramienta, su finalidad, condiciones de aplicación y habilidades requeridas en su dinamización.</p> <p>En personas con experiencia previa en dinamización de grupos puede ser suficiente una autoformación a partir de las publicaciones de EdV.</p> <p>Las personas participantes en la evaluación no requieren formación más allá de las instrucciones que se proporcionen en el momento de la misma.</p> | <p>Composición de la mesa o espacio intersectorial de participación, del consejo de salud:</p> <ul style="list-style-type: none"> <li>- Administración local: áreas de salud, transporte, urbanismo, servicios sociales, educación, medio ambiente, cultura, juventud, personas mayores, igualdad, participación...</li> <li>- Profesionales del territorio: técnicos/as municipales (de juventud, deporte, cultura, participación, servicios sociales), bibliotecarios/as, profesorado, del ámbito sanitario...</li> <li>- Organizaciones locales del tercer sector.</li> <li>- Ciudadanía organizada y no organizada: asociaciones de vecinas/os, de personas mayores, de mujeres, de personas migrantes, deportivas, culturales, religiosas, grupos informales, vecinos y vecinas...</li> </ul> | <p>En el ámbito urbano, para su aplicación en barrios, la Administración local puede estar representada por las juntas de distrito, concejalías de barrio u otras figuras similares.</p> <p>En el ámbito rural se puede promover EdV de ámbito regional o comarcal desde las mancomunidades.</p> <p>Contar, tanto en el grupo motor como en el espacio intersectorial, con profesionales de servicios mancomunados (servicios sociales, agencias de juventud, igualdad, de desarrollo local...) favorece la mirada comarcal o regional del análisis, poniendo en valor la afectación similar de diversos municipios por una misma dimensión evaluada.</p> |

|                                                                    |                                                                                                                                                                                                                                                                                                                                                                                                                                                                                                                                                                                                                                                                                                                                                          |                                                                                                                                                                                                                                                                                                                                                                                                                                                                                                                                                                                                                                                                                                                                                                                                                                                                                                                                                                                                                                                                                                                    |                                                                                                                                                                                                                                                                                                                                                                                                                                                                                                                                                                                                                                                                                                                                                                                                                                                                                                                                                                                                                                                                                     |
|--------------------------------------------------------------------|----------------------------------------------------------------------------------------------------------------------------------------------------------------------------------------------------------------------------------------------------------------------------------------------------------------------------------------------------------------------------------------------------------------------------------------------------------------------------------------------------------------------------------------------------------------------------------------------------------------------------------------------------------------------------------------------------------------------------------------------------------|--------------------------------------------------------------------------------------------------------------------------------------------------------------------------------------------------------------------------------------------------------------------------------------------------------------------------------------------------------------------------------------------------------------------------------------------------------------------------------------------------------------------------------------------------------------------------------------------------------------------------------------------------------------------------------------------------------------------------------------------------------------------------------------------------------------------------------------------------------------------------------------------------------------------------------------------------------------------------------------------------------------------------------------------------------------------------------------------------------------------|-------------------------------------------------------------------------------------------------------------------------------------------------------------------------------------------------------------------------------------------------------------------------------------------------------------------------------------------------------------------------------------------------------------------------------------------------------------------------------------------------------------------------------------------------------------------------------------------------------------------------------------------------------------------------------------------------------------------------------------------------------------------------------------------------------------------------------------------------------------------------------------------------------------------------------------------------------------------------------------------------------------------------------------------------------------------------------------|
| <p>1: Definición del territorio, participantes y planificación</p> | <p>Se delimita el territorio a evaluar.</p> <p>Se identifica qué grupos de conversación se van a realizar de acuerdo con las características sociodemográficas del territorio y con los ejes de desigualdad (género, edad, territorio, estatus migratorio, diversidad funcional, clase social, etnia).</p> <p>Se diseña una estrategia de difusión que estimule la participación específica para cada grupo social.</p> <p>Se incorpora en el diseño de los grupos y del plan de difusión al personal técnico del territorio (ayuntamiento, salud pública, centro de salud, educación, participación, mancomunidad), a personas integrantes del equipo de gobierno y a agentes o líderes comunitarios que conozcan bien el lugar y a sus habitantes.</p> | <p>El territorio a evaluar puede ser un barrio, un municipio pequeño o una ciudad, una pedanía, o un grupo de municipios de una misma comarca o región que compartan administraciones o servicios.</p> <p>Algunos ejemplos de grupos de conversación son:</p> <ul style="list-style-type: none"> <li>- Espacio de participación, mesa de salud o intersectorial, o consejo de salud.</li> <li>- Equipo de gobierno o técnicos/as del territorio.</li> <li>- Técnicos/as del territorio.</li> <li>- Representantes de asociaciones y entidades.</li> <li>- Un grupo por cada barrio de la ciudad.</li> <li>- Mujeres en situación de vulnerabilidad.</li> <li>- Personas mayores.</li> <li>- Jóvenes.</li> <li>- Personas migrantes.</li> <li>- Personas con discapacidad.</li> </ul> <p>Los servicios sociales de los ayuntamientos o mancomunidades, los centros de atención primaria, los agentes de desarrollo rural u otros/as técnicos/as del territorio pueden identificar qué colectivos más desfavorecidos habitan el territorio a evaluar e ir incorporando nuevos grupos de conversación al proceso.</p> | <p>Se debe valorar si el territorio a analizar se considera a sí mismo como una unidad, si se tiene cierto sentido de identidad y pertenencia al mismo, y si comparte servicios con otros territorios.</p> <p>Es importante que todas las personas que participen reconozcan el territorio a evaluar.</p> <p>En municipios grandes o ciudades, dado que los grupos no deben ser mayores de 15 personas, se pueden dividir en subgrupos.</p> <p>En el ámbito rural es habitual que las personas pertenezcan a varios grupos simultáneamente (mujer mayor, de la asociación de vecinas que forma parte de la mesa intersectorial), por lo que los grupos deberán diseñarse para que sean lo más heterogéneos posible.</p> <p>Para definir áreas en el territorio a evaluar se pueden utilizar herramientas cartográficas que ayuden a identificar áreas urbanas sensibles, como el <i>Visor de Espacios Urbanos Sensibles de la Comunitat Valenciana</i><sup>8</sup> o el <i>Atlas de distribución de renta de los hogares</i><sup>9</sup> del Instituto Nacional de Estadística.</p> |
|--------------------------------------------------------------------|----------------------------------------------------------------------------------------------------------------------------------------------------------------------------------------------------------------------------------------------------------------------------------------------------------------------------------------------------------------------------------------------------------------------------------------------------------------------------------------------------------------------------------------------------------------------------------------------------------------------------------------------------------------------------------------------------------------------------------------------------------|--------------------------------------------------------------------------------------------------------------------------------------------------------------------------------------------------------------------------------------------------------------------------------------------------------------------------------------------------------------------------------------------------------------------------------------------------------------------------------------------------------------------------------------------------------------------------------------------------------------------------------------------------------------------------------------------------------------------------------------------------------------------------------------------------------------------------------------------------------------------------------------------------------------------------------------------------------------------------------------------------------------------------------------------------------------------------------------------------------------------|-------------------------------------------------------------------------------------------------------------------------------------------------------------------------------------------------------------------------------------------------------------------------------------------------------------------------------------------------------------------------------------------------------------------------------------------------------------------------------------------------------------------------------------------------------------------------------------------------------------------------------------------------------------------------------------------------------------------------------------------------------------------------------------------------------------------------------------------------------------------------------------------------------------------------------------------------------------------------------------------------------------------------------------------------------------------------------------|

|                                   |                                                                                                                                                                                                                                                                                                                                                                                                                                                                                                                                                                                                                                                                                                                                                                                                                                                                                                                                                                                                                                                                                                                                                                                                                                                                                                                                                                                                                                                                               |                                                                                                                                                                                                                                                                                                                                                                                                                                                                                                                                                                                                                                                                                                                                                                                                                                                                                                                                                                                                                                                                                                                                                                                                                                                                                                                                                         |                                                                                                                                                                                                                                                                                                                                                                                                                                                                                                                                                                    |
|-----------------------------------|-------------------------------------------------------------------------------------------------------------------------------------------------------------------------------------------------------------------------------------------------------------------------------------------------------------------------------------------------------------------------------------------------------------------------------------------------------------------------------------------------------------------------------------------------------------------------------------------------------------------------------------------------------------------------------------------------------------------------------------------------------------------------------------------------------------------------------------------------------------------------------------------------------------------------------------------------------------------------------------------------------------------------------------------------------------------------------------------------------------------------------------------------------------------------------------------------------------------------------------------------------------------------------------------------------------------------------------------------------------------------------------------------------------------------------------------------------------------------------|---------------------------------------------------------------------------------------------------------------------------------------------------------------------------------------------------------------------------------------------------------------------------------------------------------------------------------------------------------------------------------------------------------------------------------------------------------------------------------------------------------------------------------------------------------------------------------------------------------------------------------------------------------------------------------------------------------------------------------------------------------------------------------------------------------------------------------------------------------------------------------------------------------------------------------------------------------------------------------------------------------------------------------------------------------------------------------------------------------------------------------------------------------------------------------------------------------------------------------------------------------------------------------------------------------------------------------------------------------|--------------------------------------------------------------------------------------------------------------------------------------------------------------------------------------------------------------------------------------------------------------------------------------------------------------------------------------------------------------------------------------------------------------------------------------------------------------------------------------------------------------------------------------------------------------------|
| <p>2: Recogida de información</p> | <p>Tipos de herramienta:</p> <ul style="list-style-type: none"> <li>- Extensa: folleto extenso, con explicación del cuestionario, espacio para escribir respuestas razonadas y diagrama en tela de araña.</li> <li>- Reducida: contiene explicación breve de la herramienta, pero no incluye espacio para desarrollar respuestas.</li> <li>- <i>Online</i>: es la versión reducida con acceso <i>online</i>. Cuenta con menor espacio para desarrollar respuestas.</li> </ul> <p>Métodos de recogida de información:</p> <ul style="list-style-type: none"> <li>- Entrevista individual: entrevista estructurada realizada con la herramienta grupal o reducida, o realización de la evaluación de forma autoadministrada u <i>online</i>.</li> <li>- Grupo de conversación: mediante sesiones de 2 horas de duración en las que se dinamiza la conversación de un grupo de 12-15 personas.</li> <li>- Sesión comunitaria: colocación de un punto informativo visible aprovechando algún evento local, donde realizar entrevistas estructuradas a pie de calle (mercadillo, feria, Día mundial...)</li> </ul> <p>Información a recoger:</p> <ul style="list-style-type: none"> <li>- Sociodemográfica: sexo, edad, nacionalidad, nivel de estudios, grado de discapacidad, situación laboral, barrio o municipio donde vive, estado de salud percibido.</li> <li>- Cuantitativa: puntuaciones individuales y grupales para cada dimensión.</li> <li>- Cualitativa:</li> </ul> | <p>La versión íntegra de EdV es idónea tanto para ser autoadministrada como para la evaluación grupal.</p> <p>En las sesiones grupales se recogen las puntuaciones y los comentarios individuales anotados, y la persona dinamizadora recopila los datos grupales.</p> <p>La versión reducida está indicada para dirigir una entrevista estructurada individual o para realizar la conversación a pie de calle, donde la persona entrevistadora recoge las puntuaciones y los comentarios.</p> <p>La sesión comunitaria puede realizarse mediante la ubicación de un <i>stand</i> en algún evento local, como una feria de entidades, un mercadillo municipal, una semana deportiva, una semana cultural...</p> <p>Favorece la difusión de la acción y la recolección de datos de la ciudadanía en general, aumentando una participación heterogénea. Se puede utilizar un diagrama en tela de araña donde representar gráficamente todas las puntuaciones de la jornada, entregar folletos informativos o difundir el acceso a la herramienta <i>online</i> (código QR).</p> <p>Se alcanza la saturación cuando los datos recopilados no aportan nueva información sobre el territorio.</p> <p>Para alcanzar la saturación de datos se requiere la combinación de diferentes métodos de recogida de información e incluso de tipos de herramienta.</p> | <p>En función del nivel de cohesión del barrio o municipio se puede elegir un tipo u otro de herramienta o de método. En aquellos territorios menos cohesionados pueden funcionar mejor los grupos de conversación, con el cuestionario extenso, y en los más cohesionados, la sesión comunitaria y las entrevistas.</p> <p>Debe buscarse el efecto «bola de nieve» para alcanzar al mayor número de personas participantes y su mayor diversidad.</p> <p>En el inicio de la recogida de información debe comenzar la difusión del proyecto y cómo participar.</p> |
|-----------------------------------|-------------------------------------------------------------------------------------------------------------------------------------------------------------------------------------------------------------------------------------------------------------------------------------------------------------------------------------------------------------------------------------------------------------------------------------------------------------------------------------------------------------------------------------------------------------------------------------------------------------------------------------------------------------------------------------------------------------------------------------------------------------------------------------------------------------------------------------------------------------------------------------------------------------------------------------------------------------------------------------------------------------------------------------------------------------------------------------------------------------------------------------------------------------------------------------------------------------------------------------------------------------------------------------------------------------------------------------------------------------------------------------------------------------------------------------------------------------------------------|---------------------------------------------------------------------------------------------------------------------------------------------------------------------------------------------------------------------------------------------------------------------------------------------------------------------------------------------------------------------------------------------------------------------------------------------------------------------------------------------------------------------------------------------------------------------------------------------------------------------------------------------------------------------------------------------------------------------------------------------------------------------------------------------------------------------------------------------------------------------------------------------------------------------------------------------------------------------------------------------------------------------------------------------------------------------------------------------------------------------------------------------------------------------------------------------------------------------------------------------------------------------------------------------------------------------------------------------------------|--------------------------------------------------------------------------------------------------------------------------------------------------------------------------------------------------------------------------------------------------------------------------------------------------------------------------------------------------------------------------------------------------------------------------------------------------------------------------------------------------------------------------------------------------------------------|

|  |                                                                                                                                                                                                                                                                  |  |  |
|--|------------------------------------------------------------------------------------------------------------------------------------------------------------------------------------------------------------------------------------------------------------------|--|--|
|  | <ul style="list-style-type: none"><li>- Ideas clave que caracterizan el territorio evaluado, necesidades identificadas, áreas de mejora, fortalezas.</li><li>- Propuestas de mejora.</li><li>- Recursos comunitarios.</li><li>- Activos para la salud.</li></ul> |  |  |
|--|------------------------------------------------------------------------------------------------------------------------------------------------------------------------------------------------------------------------------------------------------------------|--|--|

|                                      |                                                                                                                                                                                                                                                                                                                                                                                                                                                                                                                                                                                                                                                                                                                                                                                                                                                                                                                                                                                                                                                                                                                                                                                                                                                                                                                                          |                                                                                                                                                                                                                                                                                                                                                                                                                                                                                                                                                                                                                                                                                                                                                                                                                                                                                                            |                                                                                                                                                                                                                                                                                                                                                                                                                                                                                                                                                                                          |
|--------------------------------------|------------------------------------------------------------------------------------------------------------------------------------------------------------------------------------------------------------------------------------------------------------------------------------------------------------------------------------------------------------------------------------------------------------------------------------------------------------------------------------------------------------------------------------------------------------------------------------------------------------------------------------------------------------------------------------------------------------------------------------------------------------------------------------------------------------------------------------------------------------------------------------------------------------------------------------------------------------------------------------------------------------------------------------------------------------------------------------------------------------------------------------------------------------------------------------------------------------------------------------------------------------------------------------------------------------------------------------------|------------------------------------------------------------------------------------------------------------------------------------------------------------------------------------------------------------------------------------------------------------------------------------------------------------------------------------------------------------------------------------------------------------------------------------------------------------------------------------------------------------------------------------------------------------------------------------------------------------------------------------------------------------------------------------------------------------------------------------------------------------------------------------------------------------------------------------------------------------------------------------------------------------|------------------------------------------------------------------------------------------------------------------------------------------------------------------------------------------------------------------------------------------------------------------------------------------------------------------------------------------------------------------------------------------------------------------------------------------------------------------------------------------------------------------------------------------------------------------------------------------|
| <p>3: Análisis de la información</p> | <p>Este proceso puede ser realizado por una persona facilitadora o por el propio grupo de forma colaborativa.</p> <p>Los datos cuantitativos se analizan a partir de las medias de las puntuaciones obtenidas en función de los grupos o variables y de las dimensiones evaluadas.</p> <p>El análisis cualitativo consiste en la transcripción de las argumentaciones, la organización, el análisis y la clasificación en función de las categorías.</p> <p>Conviene analizar cuantitativamente:</p> <ul style="list-style-type: none"> <li>- Cómo se relacionan las variables sociodemográficas con las 14 dimensiones.</li> <li>- Cómo varía la puntuación de cada dimensión entre los barrios o territorios evaluados.</li> </ul> <p>Y cualitativamente, por cada grupo de conversación:</p> <ul style="list-style-type: none"> <li>- Cómo describen cada dimensión evaluada.</li> <li>- Por qué hay dimensiones peor o mejor evaluadas.</li> <li>- Cuáles son los argumentos que subyacen a las puntuaciones.</li> <li>- Cuáles son las áreas problema y qué activos para la salud identifican.</li> </ul> <p>Conviene analizar de forma global:</p> <ul style="list-style-type: none"> <li>- Cómo se describe en conjunto cada dimensión evaluada.</li> <li>- Cuáles son los argumentos que subyacen a las puntuaciones.</li> </ul> | <p>Puntuar una dimensión del 1 al 10 se relaciona con la puntuación académica, por lo que con menos de 5 puntos «suspende» la dimensión. Las representaciones gráficas (Fig. 1) se pueden basar en este sistema para facilitar el análisis.</p> <p>La comparación entre dimensiones debe hacerse a nivel grupal, pues hay grupos más o menos críticos que puntúan globalmente peor o mejor que otros grupos en todas las dimensiones.</p> <p>Algunos ejemplos de preguntas para analizar serían: ¿Qué dimensiones están mejor o peor evaluadas? ¿Quiénes las evalúan mejor o peor? ¿Qué diferencias hay entre géneros en relación con las dimensiones? ¿Y en cuanto a la edad? ¿Y entre personas que trabajan o en desempleo? ¿Qué diferencias hay entre barrios? ¿A quiénes afectan más estas diferencias?</p> <p>El análisis cualitativo debe responder los porqués de los resultados cuantitativos.</p> | <p>En los municipios pequeños o en los barrios menos cohesionados los datos cualitativos cobran mayor relevancia que los cuantitativos al no poder contar con una muestra suficiente para garantizar la representatividad de la población.</p> <p>En los municipios más grandes debe tenerse en cuenta que algunas dimensiones, como <i>Servicios</i> o <i>Trabajo y economía local</i>, probablemente se tengan que analizar a nivel ciudad o de mancomunidad, mientras que otras, como <i>Vivienda y comunidad</i> o <i>Transporte público</i>, deban evaluarse a nivel de barrio.</p> |
|--------------------------------------|------------------------------------------------------------------------------------------------------------------------------------------------------------------------------------------------------------------------------------------------------------------------------------------------------------------------------------------------------------------------------------------------------------------------------------------------------------------------------------------------------------------------------------------------------------------------------------------------------------------------------------------------------------------------------------------------------------------------------------------------------------------------------------------------------------------------------------------------------------------------------------------------------------------------------------------------------------------------------------------------------------------------------------------------------------------------------------------------------------------------------------------------------------------------------------------------------------------------------------------------------------------------------------------------------------------------------------------|------------------------------------------------------------------------------------------------------------------------------------------------------------------------------------------------------------------------------------------------------------------------------------------------------------------------------------------------------------------------------------------------------------------------------------------------------------------------------------------------------------------------------------------------------------------------------------------------------------------------------------------------------------------------------------------------------------------------------------------------------------------------------------------------------------------------------------------------------------------------------------------------------------|------------------------------------------------------------------------------------------------------------------------------------------------------------------------------------------------------------------------------------------------------------------------------------------------------------------------------------------------------------------------------------------------------------------------------------------------------------------------------------------------------------------------------------------------------------------------------------------|

|                                                         |                                                                                                                                                                                                                                                                                                                                                                                                                                                                                                                                                                                                                                                                                                                                                                                                                        |                                                                                                                                                                                                                                                                                                                                                                                                                                                                                                                                                                                                                                                                                                                                                                                                                                                  |                                                                                                                                                                                                                                                                                                                                                                                                                                                                                                                                                                                                                                                                                                                         |
|---------------------------------------------------------|------------------------------------------------------------------------------------------------------------------------------------------------------------------------------------------------------------------------------------------------------------------------------------------------------------------------------------------------------------------------------------------------------------------------------------------------------------------------------------------------------------------------------------------------------------------------------------------------------------------------------------------------------------------------------------------------------------------------------------------------------------------------------------------------------------------------|--------------------------------------------------------------------------------------------------------------------------------------------------------------------------------------------------------------------------------------------------------------------------------------------------------------------------------------------------------------------------------------------------------------------------------------------------------------------------------------------------------------------------------------------------------------------------------------------------------------------------------------------------------------------------------------------------------------------------------------------------------------------------------------------------------------------------------------------------|-------------------------------------------------------------------------------------------------------------------------------------------------------------------------------------------------------------------------------------------------------------------------------------------------------------------------------------------------------------------------------------------------------------------------------------------------------------------------------------------------------------------------------------------------------------------------------------------------------------------------------------------------------------------------------------------------------------------------|
|                                                         | - Cuáles son las áreas problema y qué activos para la salud identifican.                                                                                                                                                                                                                                                                                                                                                                                                                                                                                                                                                                                                                                                                                                                                               |                                                                                                                                                                                                                                                                                                                                                                                                                                                                                                                                                                                                                                                                                                                                                                                                                                                  |                                                                                                                                                                                                                                                                                                                                                                                                                                                                                                                                                                                                                                                                                                                         |
| 4: Devolución de la información y vínculo con la acción | <p>Los resultados de la evaluación deben organizarse para visibilizar las desigualdades existentes entre los diferentes grupos que componen la comunidad y relacionarlos con los determinantes sociales.</p> <p>La devolución de los resultados debe contar con todas las personas que hayan participado en el proceso.</p> <p>Se finaliza el proceso priorizando necesidades o acciones de mejora. Se pueden emplear técnicas sencillas de priorización por grupos o en sesiones comunitarias.</p> <p>Las necesidades detectadas, los activos para la salud, los recursos comunitarios y las mejoras propuestas pueden ser categorizadas en función de los niveles de intervención con perspectiva de determinantes sociales<sup>5</sup>: individual, de comunidad, de políticas públicas y de estructura social.</p> | <p>Se favorece la reflexión colectiva relacionando gráficamente las dimensiones que requieren acción prioritaria con algún modelo de los Determinantes Sociales de la Salud.</p> <p>Los métodos de devolución deben ser adecuados para cada grupo destinatario. Para las Administraciones, decisores/as políticos/as y profesionales se pueden realizar informes y sesiones empleando parrillas de análisis o gráficos (Fig. 1). Para la ciudadanía se pueden confeccionar dípticos, vídeos, sesiones comunitarias abiertas, etc., aunque se recomiendan acciones presenciales.</p> <p>En el enfoque hacia la acción se identifica qué acciones se pueden emprender o impulsar a nivel individual o colectivo, para visibilizar y disminuir la vulnerabilidad de grupos específicos e incidir a nivel político y de la Administración local.</p> | <p>En los municipios medianos o grandes se deben comunicar los resultados diferenciando cuáles corresponden al barrio y cuáles a la ciudad, escalando los resultados de más a menos próximo o local.</p> <p>Los municipios pequeños compartirán en muchos casos necesidades, recursos o activos para la salud, que requieran acciones o dinimizaciones de ámbito regional o mancomunadas.</p> <p>La inclusión desde el inicio del proceso de la Administración local facilita su implicación posterior en la acción.</p> <p>En el ámbito más local debe gestionarse la devolución de la información como punto de partida de corresponsabilidad y coproducción de acciones entre la Administración y la ciudadanía.</p> |

**Figura I.** Ejemplos de representación gráfica de la información cuantitativa obtenida con la herramienta *Entornos de Vida*.

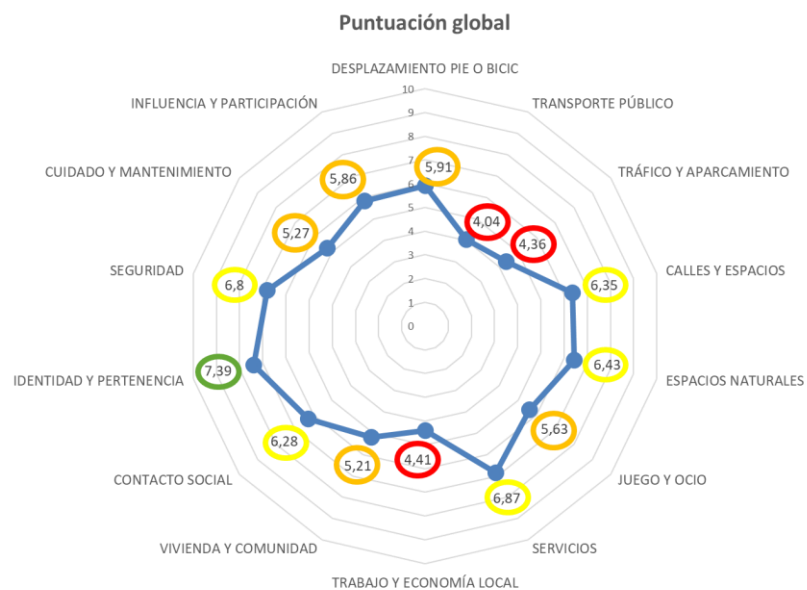

a) Diagrama en tela de araña

| DIMENSIÓN                     | GLOBAL | GÉNERO |      | EDAD  |       |       |     | NIVEL ESTUDIOS |       |      | SITUACIÓN LABORAL |         |      |          | DISCAPACIDAD |      | NACIONALIDAD |        |          |
|-------------------------------|--------|--------|------|-------|-------|-------|-----|----------------|-------|------|-------------------|---------|------|----------|--------------|------|--------------|--------|----------|
|                               |        | Fem    | Masc | 18-35 | 36-50 | 51-65 | >65 | Bajo           | Medio | Alto | Estudia           | Trabaja | Paro | Jubilado | >33%         | <33% | España       | Europa | Fuera UE |
| 1 DESPLAZAMIENTO PIE O BICIC  |        |        |      |       |       |       |     |                |       |      |                   |         |      |          |              |      |              |        |          |
| 2 TRANSPORTE PÚBLICO          |        |        |      |       |       |       |     |                |       |      |                   |         |      |          |              |      |              |        |          |
| 3 TRÁFICO Y APARCAMIENTO      |        |        |      |       |       |       |     |                |       |      |                   |         |      |          |              |      |              |        |          |
| 4 CALLES Y ESPACIOS           |        |        |      |       |       |       |     |                |       |      |                   |         |      |          |              |      |              |        |          |
| 5 ESPACIOS NATURALES          |        |        |      |       |       |       |     |                |       |      |                   |         |      |          |              |      |              |        |          |
| 6 JUEGO Y OCIO                |        |        |      |       |       |       |     |                |       |      |                   |         |      |          |              |      |              |        |          |
| 7 SERVICIOS                   |        |        |      |       |       |       |     |                |       |      |                   |         |      |          |              |      |              |        |          |
| 8 TRABAJO Y ECONOMÍA LOCAL    |        |        |      |       |       |       |     |                |       |      |                   |         |      |          |              |      |              |        |          |
| 9 VIVIENDA Y COMUNIDAD        |        |        |      |       |       |       |     |                |       |      |                   |         |      |          |              |      |              |        |          |
| 10 CONTACTO SOCIAL            |        |        |      |       |       |       |     |                |       |      |                   |         |      |          |              |      |              |        |          |
| 11 IDENTIDAD Y PERTENENCIA    |        |        |      |       |       |       |     |                |       |      |                   |         |      |          |              |      |              |        |          |
| 12 SEGURIDAD                  |        |        |      |       |       |       |     |                |       |      |                   |         |      |          |              |      |              |        |          |
| 13 CUIDADO Y MANTENIMIENTO    |        |        |      |       |       |       |     |                |       |      |                   |         |      |          |              |      |              |        |          |
| 14 INFLUENCIA Y PARTICIPACIÓN |        |        |      |       |       |       |     |                |       |      |                   |         |      |          |              |      |              |        |          |

Puntuación: <5 5-6 6-7 7-8 >8

b) Parrilla de análisis: puntuación por dimensión y variable sociodemográfica
